# Supplementary material for: Concentration, sources and light absorption characteristics of dissolved organic carbon on a typical glacier, the northeastern Tibetan Plateau
Source: Copernicus journal article supplement (doi:10.5194/tc-2016-53), 2016-04-11
Supplement: Supplementary file [file tc-2016-53-AC1-supplement.pdf]

1 **Reply to Anonymous Referee No.1**

2 We are very grateful for the reviewer and appreciate your comment and suggestions. All  
3 responses or changes have been made below. The responses are marked blue.

4 Thank you very much

5 Kind regards,

6 Fangping Yan

7 (on behalf of the co-authors)

8 1. It is assumed that the strong relationship between  $\text{Ca}^{2+}$  and DOC (Fig. S3) reflects a  
9 primary source for  $\text{Ca}^{2+}$  and DOC from the same allochthonous source. Could not the DOC  
10 however be produced by later autochthonous or heterotrophic biological activity within the  
11 snowpack/ice surface, catalysed by nutrients associated with the dust? This should be at least  
12 discussed, and abstract and concluding statements adjusted accordingly.

13 Response: Thanks for the meaningful suggestion. Yes, DOC may also be produced by these  
14 activities. We discussed these potential sources in the section 3.2. The abstract and  
15 concluding statements were adjusted accordingly.

16

17 2. How was discharge measured? You give the discharge data in the supplementary info, but  
18 you need to either a) give details of methods used to discharge at the gauging station or b) cite  
19 a reference for this data.

20 Response: Thank you for your advice. The discharge measurement of LHG glacier has been  
21 discussed (Gao et al., 2014). In detail: The hydrological gauging site was setup at about 0.8  
22 km downstream of the glacier terminus. It meets the requirements for a hydrological gauging  
23 site. Horizon walls were built on the both sides of the river, and an automatic barometric  
24 sensor (HOBO Water Level Logger, Onset, America) was installed in the wall to record water  
25 pressure every 10 minutes to calculate the water levels. There was a bridge across the river to  
26 facilitate the flow velocity measurement using propeller blade current meter (Model LS25-1,  
27 Huazheng Hydrometric Instrument Ltd). The river channel was divided into nine segments in  
28 which flow velocity and water depth were measured. Coupled with mean flow velocity, width  
29 of each segment and water depth, discharge at specific water level was obtained. By including  
30 maximum and minimum water level in a year, a discharge relationship with water levels was  
31 developed. Therefore, using the HOBO water lever record, discharge of all seasons was  
32 calculated. This part was added in the supplementary information. Below is the picture of the  
33 gauging station of the glacier.

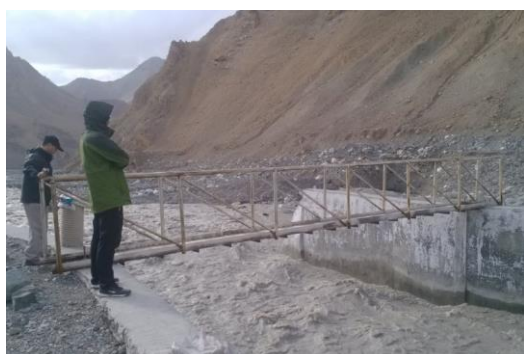

34

35 3. Line 82 – be better to give numbers of different samples individually here, not just sum of  
36 total samples

37 Response: The sum of total samples has been changed to numbers of different individual  
38 samples.

39

40 4. Line 82 – how was ice sampled – using an ice axe? Shallow drill? To what depth? Were  
41 they also collected in the same plastic bottles after crushing?

42 Response: The 0-3 cm and 3-5 cm ice was sampled using a pre-cleaned ice axe and collected  
43 in the 125 mL pre-cleaned polycarbonate bottles after crushing similar with other samples,  
44 this information was added in section 2.2.

45

46 5. Line 115 – how were the plastic bottles cleaned?

47 Response: The plastic polycarbonate bottles were firstly cleaned by ultrapure water for three  
48 times, then soaked into 1 M HCl for 24 h (Spencer et al., 2009), after that washed for three  
49 times using ultrapure water, finally soaked into ultrapure water for over 24 h. This  
50 information was added into the method part 2.2.

51

52 6. Line 162 – I'd use pre-combusted or pre-baked rather than pre-burned.

53 Response “Pre-burned” has been changed to “pre-combusted” through the whole text.

54

55 7. Line 164 – I am unclear as to the methodology here. You state that the experimental  
56 samples are first filtered through 0.7um nominal filters, then incubated. But won't the  
57 filtration remove much of the biological activity? Plus isn't refrigerating the already filtered  
58 samples to act as controls effectively the same as the non control samples? Do you mean  
59 instead that samples were actually incubated prior to filtration, and then filtered at each time  
60 point then refrigerated? If so, please rewrite. And if so, please state the values of controls and  
61 place them on Fig 3. Note that you are unlikely to remove all microorganisms when filtering  
62 through the nominal 0.7um filters, so they shouldn't be expected to be sterile i.e. the initial  
63 samples may also have had some biological activity, hence the BDOC values should be seen  
64 as minimum values.

65 Response: Thanks for the suggestions. Although it might remove some part of the biological  
66 activity, this method was used in previous researches (e.g. Spencer et al., 2014). We adopted  
67 this method for the purpose of easy comparison with previous results. In detail, we filtered the  
68 samples, then started the experiment: firstly, refrigerated the two filtered original samples,  
69 other samples were put in the outside natural environment, and every 3 days 2 samples were  
70 put into the refrigerator to keep frozen till analysis. The control value was added on Figure 3.  
71 According to the other reviewer, Figure 3 was changed to Figure 4 as below.

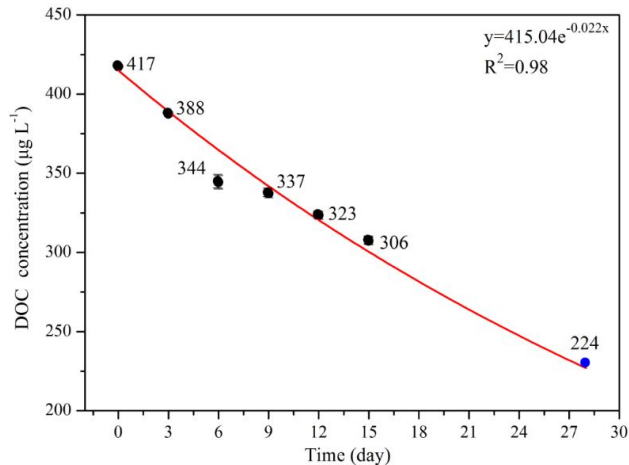

72

73 Figure 4 Exponential decreases in DOC concentrations during the biodegradation experiment. Note: The  
 74 blue point is calculated using equations derived from the experimental data (black point). Mean values  
 75  $\pm$  standard deviations of duplicate treated samples are presented.

76

77 8. Line 177 – DOC could also be influenced by microbial activity – see point 1 above.

78 Response: We agree that DOC was influenced not only by the mineral dust but also the  
 79 microbial activities. “Microbial activity” has been added in the sentences.

80

81 9. Line 189 – again, should mention potential biological activity here

82 Response: We added the potential biological activity in the sentence.

83

84 10. Line 198 – you estimate from extrapolation that 43.2% DOC could be re-mineralized  
 85 within 28 days. How does 28 days compare with the likely residence time of supraglacial  
 86 runoff and river runoff, where will the water be in this time – still in a river, or lake, could the  
 87 DOC survive long enough to impact additional downstream ecosystems?

88 Response: Supraglacial runoff of LHG glacier No. 12 is the headwater of Xiaochangma River,  
 89 which disappears as underground water at the mouth of LHG valley and appears as the spring  
 90 downstream, flowing into Shule River in the place of Changma. Therefore, DOC can survive  
 91 long enough to impact the downstream ecosystem.

92

93 11. Line 205 – I don’t think Anesio et al 2009 looked at viruses. A good additional reference  
 94 for viruses would be Bellas et al 2012 ‘Viral impacts on bacterial communi-ties in Arctic  
 95 cryoconite’ Env Res Lett 8 <http://iopscience.iop.org/article/10.1088/1748-9326/8/4/045021>.

96 Response: Reference “Bellas et al., 2013” was added in the text, and the section of DOC  
 97 sources was rewritten according to your point 1.

98

99 12. I found that the number of acronyms made it harder to read. For those used only a couple  
 100 of times (e.g. BrC for brown carbon, WSOC for water soluble organic matter). I’d write them  
 101 out in full each time simply to aid readability.

102 Response: These acronyms were rewritten in full name in the text.

103

104 13. There are too many decimal points e.g. in abstract 6,949.4 kg (line 27) should be rewritten

105 as 6,950 kg; 425.8 (line 26) should be rewritten as 426. And the same throughout the main  
106 text and supplementary information.

107 **Response:** Adjusted accordingly throughout the main text and supplementary information.

108

109 14. Figures:

110 1) Fig. 2. Add in error bars both ways, plus put n = x under each bar for sample numbers.

111 **Response:** Adjusted accordingly.

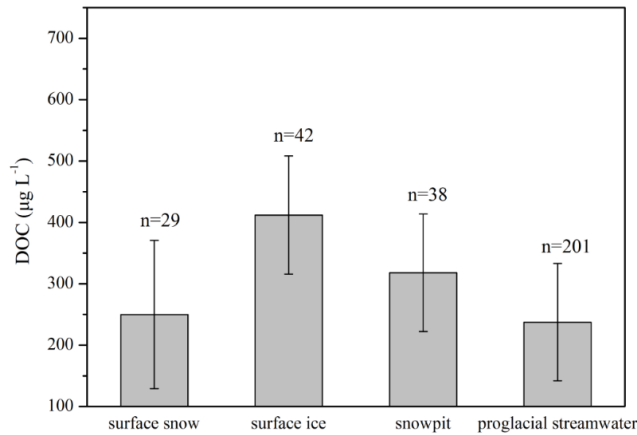

112

113 **Figure 2** Average DOC concentrations of ice, snow and proglacial streamwater for LHG glacier.

114

115 2) Fig. 3. I would have thought that the relationship here could also be adequately described  
116 by a linear regression. Also, need to put control (refrigerated) values on here.

117 **Response:** The control values were added on the Figure 3. Yes, based on the data only, the  
118 linear regression could be adequate. However, according to the DOC bioavailability, the  
119 exponential one can be more authentic (Spencer et al., 2015), because some DOC are  
120 bio-refractory, so that DOC cannot reach zero with long enough resident time. The modified  
121 figures are shown on Figure 3, and this Figure is now Figure 4 based on the other reviewer's  
122 comment as below.

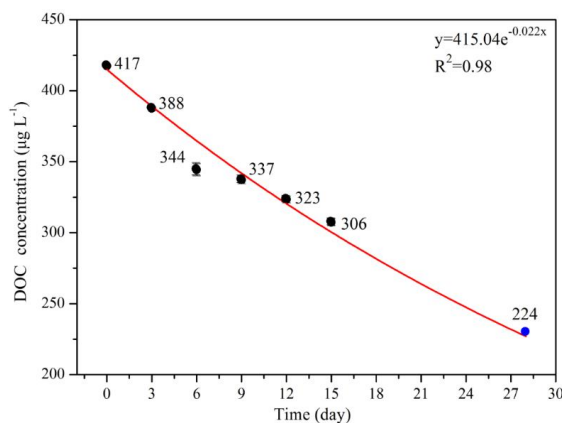

123

124 **Figure 4** Exponential decreases in DOC concentrations during the biodegradation experiment. Note: The

125 blue point is calculated using equations derived from the experimental data (black point). Mean values

126 ± standard deviations of duplicate treated samples are presented.

127 3) Fig. 4. Would help to put some lines as dotted/dashed (when printing in black+white)  
 128 Response: Yes, the line types have been changed in Figure 4, and the spectrum of desert sand  
 129 was deleted according to the other reviewer's comment. Figure 4 is now changed to Figure 5  
 130 in the main text as below.

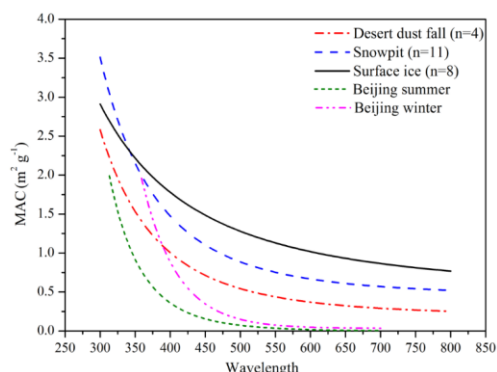

131  
 132 Figure 5 Absorption spectra for the DOC in snow and ice of LHG glacier and the dust and desert sand  
 133 from surrounding areas.

134  
 135 4) Fig. 5. Again, be better to have one line dotted or dashed plus have different symbols to aid  
 136 interpretation when printing in black + white.

137 Response: The line and symbol types have been changed, and this Figure is now changed to  
 138 Figure 6 in the main text based on the other reviewer's comment.

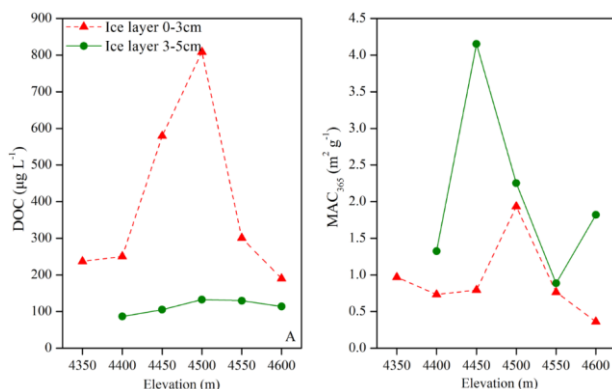

139  
 140 Figure 6 Comparison of DOC concentrations (A) and MAC365 (B) between surface and subsurface  
 141 ice.

142  
 143 5) Fig. 6. How was discharge calculated and smoothed from raw data?

144 Response: By measuring water levels and flow velocity in different parts of the river channel  
 145 in different seasons, a relationship between discharge and water levels was developed using  
 146 the minimum, maximum and usual water levels. Coupled with HOBO water lever record,  
 147 discharge of whole ablation period was calculated. Detained method was added in the  
 148 supplementary information.

149  
 150 6) Fig. S2. Typo - should be elevation, not evelation

151 Response: Has been corrected.

152  
 153 7) Fig. S4 - use different symbols for ice and snow to aid readability.

154 Response: The symbols are changed to recognize easily in Figure S4, and now it is Figure S3  
155 based on the other reviewer's comment as below.

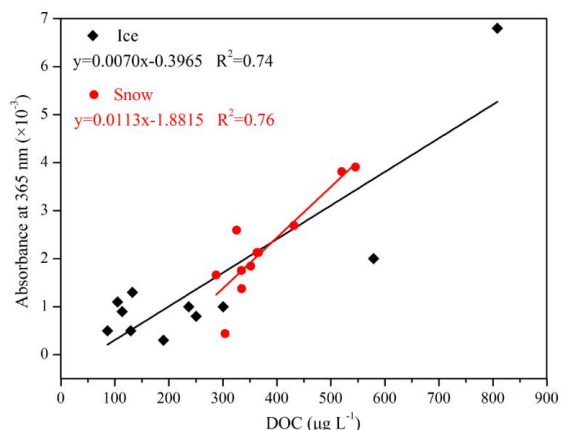

156

157 Figure S3 Relationship of the light absorbance at 365 nm and the DOC concentrations of snow and ice  
158 samples.

159

160 15. Tables:

161 1) Table 1. Use 3 sig figures throughout (e.g. 332.4 should be 332)

162 Response: Adjusted accordingly.

163

164 2) Table 2. Footnote unclear

165 Response: Very sorry for the mistake. The footnote was rewritten.

166

167 3) Table S1. Please clarify resolution - e.g. for snowpack I presume it is vertical resolution,  
168 for ice I presume horizontal distance on glacier, or is it calculated vertical distance?

169 Response: Yes, for snowpack it is vertical resolution, for surface ice and snow it is elevation  
170 interval (horizontal distance).

171

172 4) Table S2 BK2 (top line) is out of line. Plus would be better to replace BK numbers with  
173 date to show how they encompass the time of study. Could also include the mean+STDEV at  
174 bottom.

175 Response: BK numbers have been adjusted accordingly and the mean+STDEV was added at  
176 bottom.

177

178 References

179 Gao, X., Xie, X., Qin, X.: Analysis on a floor happened at the No. 12 glacier in Laohugou Valley, Qilian Mountain  
180 in June 2013, Journal of Northwest Normal University: Natural Science, 50, 88-91, 2014 (in Chinese with  
181 English abstract).

182 Spencer, R. G., Stubbins, A., Hernes, P. J., Baker, A., Mopper, K., Aufdenkampe, A. K., Dyda, R. Y., Mwamba, V.  
183 L., Mangangu, A. M., and Wabakanghanzi, J. N.: Photochemical degradation of dissolved organic matter and  
184 dissolved lignin phenols from the Congo River, J. Geophys. Res. Biogeosci., 114, doi:10.1002/2015GL063498,  
185 2009.

186 Spencer, R. G. M., Guo, W., Raymond, P. A., Dittmar, T., Hood, E., Fellman, J., and Stubbins, A.: Source and  
187 biolability of ancient dissolved organic matter in glacier and lake ecosystems on the Tibetan Plateau, Geochim.

188 Cosmochim. Acta, 142, 64-74, 2014.  
189 Spencer, R. G., Mann, P. J., Dittmar, T., Eglinton, T. I., McIntyre, C., Holmes, R. M., Zimov, N., and Stubbins, A.:  
190 Detecting the signature of permafrost thaw in Arctic rivers, Geophys. Res. Lett., 42, 2830-2835, 2015.  
191
